# Supplementary material for: Direct comparison of clathrin-mediated endocytosis in budding and fission yeast reveals conserved and evolvable features
Source: eLife. 2019 Dec 12;8:e50749. doi: 10.7554/eLife.50749 (PMC6908435; doi:10.7554/eLife.50749)
Supplement: Figure 1—source data 1. [file elife-50749-fig1-data1.xlsx]

## Sheet: spArc5vsscArc15
Maximum intensity of indicated protein at endocytic site
spArc5	scArc15
8.21053	10.26
19.307	9.67
14.1228	10.32
10.3509	11.7
9.42982	15.95
11.8246	15.18
9.23684	9.56
11.5175	12.66
8.74561	19.72
14.5263	12.62
11.0877	10.43
11.6842	12.24
10.8596	11.36
19.7895	9.68
7.64035	14.15
16.2368	12.9
13.5526	8.59
8.90351	16.56
9.22807	13.03
10.2018	12.05
12.9737	10.82
12.6754	6.9
10.2456	9.46
21.2719	7.83
9.15789	12.15
9.04386	15.74
9.92105	7.29
22.9386	11.46
14.2456	17.25
11.4561	10.33
8.81579	11.56
12.6316	14.89
8.73684	13.1
11.386	15.6
8.91228	13.64
17.0965	15.63
8.0614	6.26
15.6316	8.82
12.2193	12.52
13.7281	12.43
12.2807	12.05
10.614	10.08
10.0175	8.61
11.3246	12.43
10.886	12.31
12.7281	8.74
10.8333	10.72
13.2544	8.27
	11.73
	16.09
	11.73
	9.53
	8.34
	13.13
	16.37
	10.11
	9.47
	15.3
	12.23
	13.05
	12.02
	10.81
	10.88
	9.29
	13.08
	7.95
	12.94
	11.83
	12.08
	13.7
	12.44
	7.6
	10.72

## Sheet: spMyo1vsscMyo3&5
Maximum intensityof indicated protein at endocytic site
spMyo1	scMyo3&Myo5
8.7193	8.99
5.92982	12.43
7.99123	12.86
5.33333	14.75
5.72807	9.42
9.62281	12.21
8.57895	8.72
9.14035	11.31
6.0614	10.4
7.79825	16.06
8.26316	11.44
7.17544	13.27
7.14912	14.04
6.83333	12.58
4.75439	8.42
7.10526	8.68
4.14912	9.53
8.19298	10.38
8.92105	7.85
6.15789	9.34
2.91228	8.98
4.11404	11.91
5.22807	8.58
4.72807	9.55
2.03509	6.48
3.97368	10.47
4.67544	9.92
5.46491	9.11
6.42982	9.39
4.48246	9.14
3.44737	9.55
4.29825	7.41
3.77193	9.57
6.86842	11.77
5.53509	9.26
4.78947	6.23
6.70175	7.05
3.94737	8.39
6.95614	7.24
9.07018	8.45
4.74561	6.49
4.83333	9.88
3.92982	10.29
4.08772	7.96
5.32456	7.81
4.35965	8.47
4.64035	9.44
4.99123	7.08
3.25439	11.2
7.40351	10.49
4.80702	14.53
7.07895	12.28
4.31579	12.08
5.42105	12.97
8.28947	8.83
4.66667	19.64
	9.09
	8.02
	14.33
	7.98
	10.77
	9.85
	9.58
	12.54
	11.39
	8.1
	8.84
	11.17
	10.22
	7.4
	14.15
	11.28
	8.9
	13.78

## Sheet: spWsp1vsscLas17
Maximum intensity of indicated protein at endocytic site
spWsp1	scLas17
6.09649	4.63
6.7193	3.25
5.51754	2.16
3.19298	5.75
7.62281	4.8
5.63158	3.03
11.9298	4.12
4.78947	4.8
10.3421	4.61
4.64912	3.02
4.22807	5.5
4.70175	6.14
3.67544	4.13
6.57895	6.66
5.10526	5.27
4.5614	6.89
8.23684	5.87
8.81579	3.88
6.79825	2.09
5.66667	2.96
5.54386	5.58
6.37719	3.81
6.45614	3.13
8.42105	5.05
5.49123	4.07
7.89474	6.78
11.5263	6.69
5.18421	5.84
5.31579	3.5
11.3421	4.52
6.67544	4.32
7.29825	3.26
3.27193	3.21
4.60526	2.72
8.72807	8.26
6.18421	5.24
4.17544	5.64
4.9386	6.59
8.30702	4.56
5.12281	4.67
6.26316	4.22
7.14035	6.25
4.76316	4.7
6.38596	5.54
6.65789	5.7
3.38596	8.58
10.7368	7.34
3.84211	5.15
5.35088	5.04
4.35965	3.98
5.69298	4.47
6.64912	4.74
4.94737	5.59
6.08772	5.8
3.63158	5.35
7.07895	2.54
7.31579	2.74
7.52632	5.56
5.57018	2.86
4.47368	4.05
7	5.33
6.50877	5.19
4.54386	4.87
6.88596	5.45
5.75439	4.75
7.88596	4.34
4.71053	3.87
6.73684	4.2
5.5614	4.46
7.46491	4.18
6.08772	4.49
5.91228	5.03
9.36842	3.72
5.73684	4.77
5.66667	3.71
8.35965	3.22
4.76316	2.67
8.67544	4.03
5.37719	6.91
8.92105	4.39
5.25439	3.68
5.63158	5.8
4.65789	3.88
9.60526	5.95
4.33333	5.27
5.10526	7.11
6.55263	4.69
4.41228	3.51
6.23684	3.7
4.57895	5.41
6.65789	3.34
7.50877	4.17
8.51754	4.23
5.21053	3.76
4.92982	4.43
8.14035	3.79
7.80702	3.82
8.98246	4.06
6.48246	4.75
6
7.85965
9.14035
6.13158
9.42982
11.9825
7.01754
9.55263
6.18421
6.80702
6.42105
6.92105
5.66667
7.61404
7.86842
6.46491
7.67544

## Sheet: spVrp1vsscVrp1
Maximum intensity of indicated protein at endocytic site
spVrp1	scVrp1
6.57018	6.49
4.71053	7.73
7.51754	5.07
3.67544	4.64
7.35088	5.16
6.49123	7.48
5.45614	3.33
6.08772	6
5.29825	4.85
4.7193	6.14
7.19298	6.44
3.35088	4.77
6.04386	7.67
5.71053	4.88
4.33333	5.21
6.49123	4.21
9.01754	6.96
4.63158	3.39
9.36842	5.49
6.52632	4.86
7.27193	5.15
5.24561	6.73
6.65789	5.73
11.9298	5.45
8.72807	4.45
5.64035	5.43
6.00877	4.56
4.84211	3.64
5.14912	4.43
8.34211	4.11
6.59649	3.16
5.74561	6.42
7.47368	3.66
7.26316	4.07
4.68421	5.26
5.78947	3.9
5.4386	7.47
4.82456	6.5
12.3246	4.52
9.82456	8.62
5.62281	3.81
8.65789	7.75
7.07018	6.47
5.57018	4.33
7.07895	5.86
5.59649	6.16
9.04386	6.65
5.94737	5.13
8.30702	6.19
6.61404	7.38
7.2807	4.16
7.88596	4.14
5.47368	5.06
3.27193	4.65
7.94737	6.29
6.50877	5.58
7.46491
9.07018
6.86842

## Sheet: spFim1vsscSac6
Maximum intensity of indicated protein at endocytic site
spFim1	scSac6
14.1667	12.19
14.4737	9.54
21.6842	11.34
9.51754	9.76
13.4737	10.75
17.2544	11.22
15.4649	6.96
11.5526	14.81
15.2632	10.88
15.4474	11.26
19.0263	15.11
12.4649	8.88
15.9298	11.73
15.8158	14.86
16.0614	12.15
12.9825	13.48
18.693	6.3
15.0439	3.92
12.0175	10.24
13.7982	9.11
15.5263	14.65
15.4386	13.93
12.1053	13.28
12.5263	7.99
11.8246	9.37
18.6053	15.65
17.3421	12.15
14.9123	12.49
16.4561	17.28
15.5614	9.3
15.1754	10.8
19.8596	15.85
14.7105	15.32
18.0175	12.83
11.4474	19.16
15.7632	16.11
22.0614	15.43
20.3333	12.67
16.8509	13.32
15	13.46
15.5263	15.47
15.6754	12.88
16.7982	9.69
15.9211	11.62
14.9737	9.77
15.5965	10.94
12.614	11.85
13.1228	15.53
19.0877	7.37
18.4123	11.45
19.6404	12.03
17.0877	9.56
13.7193	15.9
17.3684	12.35
15.2018	15.6
13.114	8.57
15.0175	12.89
13.7193	14.11
12.5439	20.67
13.0263	10.25
9.98246	14.68
14.0965	14.1
18.2281	14.08
22.6842	8.59
9.29825	9.94
18.0526	16.68
18.4386	12.84
16.2456	13.78
15.5439	13.31
18.193	16.15
16.0526	9.73
15.6667	17.5
16.2018	10.01
16.0263
18.8596
12.3684
15.3158
15.8596
17.193
6.60526
7.89474
13.6316
13.886
20.0702
16.0351
14.7018
14.5702
10.4298
16.5263
17.0965
16.4912
14.5877
18.2456
13.0965
15.114
13.2632
15.0965

## Sheet: spPan1vsscPan1
Maximum intensity of indicated protein at endocytic site
spPan1	scPan1
8	5.69
4.14035	4.33
11.307	4.33
6.01754	4.28
8.69298	4.06
5.61404	3.38
5.14912	5.26
7.5614	4.39
4	2.7
5.51754	5.18
5.45614	6.26
7.78947	5.04
6.98246	1.68
4.89474	3.26
8.15789	4.23
7.4386	3.24
4.85088	4.65
5.95614	3.46
9.78947	5.38
7.53509	2.63
6.84211	3.95
5.22807	3.49
8.17544	3.84
7.59649	5.53
7.82456	4.03
8	3.96
4.04386	3.41
8.16667	3.52
8.39474	3.85
3.95614	5.48
4.74561	3.39
7.83333	3.5
7.2193	3.78
10.5526	3.34
6.71053	3.92
5.4386	5.01
9.98246
6.44737
9.92982
5.66667
4.49123
4.95614

## Sheet: spEnd4vsscSla2
Maximum intensity of indicated protein at endocytic site
spEnd4	scSla2
8.75439	10.71
7.21053	6.95
6.69298	6.33
7.73684	9.87
9.02632	6.44
6.9386	6.07
5.04386	9.29
5.64912	4.61
7.11404	7.71
5.52632	6.18
7.30702	7.82
7.50877	6.67
5.71053	11.67
5.61404	7.58
6.97368	8.51
10.1579	4.83
6.64912	7.62
4.4386	6.06
6.04386	6.11
6.37719	5.26
3.33333	4.91
6.24561	7.32
6.17544	7.98
3.84211	7.34
4.76316	5.26
3.25439	4.09
6.92982	5.5
6.17544	7.57
7.14035	6.45
6.77193	4.89
8.72807	10.66
5.69298	5.98
5	6.06
6.24561	6.74
5.7807	7.33
8.23684	6.43
8.20175	8.97
3.87719	5.66
5.42982	6.32
5.66667	7.72
6.66667	6.63
5.64912	4.42
7.42982	5.01
6.10526	8.72
5.02632	4.77
6.42105	6.19
4.96491	5.23
8.22807
