# Supplementary material for: Direct comparison of clathrin-mediated endocytosis in budding and fission yeast reveals conserved and evolvable features
Source: eLife. 2019 Dec 12;8:e50749. doi: 10.7554/eLife.50749 (PMC6908435; doi:10.7554/eLife.50749)
Supplement: Figure 2—source data 1. [file elife-50749-fig2-data1.xlsx]

## Sheet: Maximum molecular number
Maximum molecular number of indicated protein at endocytic sites
Myo5	Sla1	Las17	Cse4
118.31	119.162	115.118	120.44
213.146	210.778	86.6852	56.9674
182.16	166.168	153.953	119.477
267.606	175.749	90.1526	130.581
129.577	160.18	97.7809	89.1014
78.6385	119.162	108.877	88.6966
132.394	101.796	111.65	81.6332
84.0376	145.509	118.585	92.3469
153.991	122.754	86.6852	84.6135
159.39	77.2455	145.631	84.1808
66.4319	91.3174	73.509	74.3884
166.901	213.772	58.2524	96.0251
192.019	234.132	76.9764	81.7938
149.061	129.042	59.6394	108.644
236.385	142.814	76.2829	106.69
108.216	166.467	76.2829	75.6727
226.526	135.629	84.6047	74.7444
197.653	135.629	73.509
133.568	109.281	49.2372
177.23	197.006	109.57
192.723	163.473	107.49
168.31	124.551	108.183
243.662	80.5389	72.1221
142.019	100	90.1526
200	114.371	119.972
189.906	164.97	108.183
183.333	124.551	82.5243
237.559	91.3174	67.2677
163.85	95.8084	85.9917
124.883	106.587	107.49
132.629	152.695	75.5895
211.737	138.623	67.2677
256.808	176.946	91.5395
426.056	164.371	91.5395
193.427	103.593	73.509
219.014	208.383	71.4286
189.906	106.587	91.5395
193.192	176.048	127.601
160.094	105.389	77.6699
123.709	132.335	93.62
166.432	146.407	71.4286
242.958	129.341	97.0874
167.606	186.826	101.942
122.3	154.79	128.988
145.305	144.012	117.892
213.615	197.605	60.3329
203.521	155.389	90.1526
203.521	110.18	88.0721
213.38	116.168	90.1526
212.441	191.018	49.9307
188.498	109.581	88.7656
226.526	147.006	76.2829
233.099	114.371	102.635
111.033	165.269	95.7004
176.526	123.054	119.279
182.394	136.527	104.716
168.467	100.898	92.233
140.767	141.018	69.3481
143.206	158	73.509
142.683	180.769	81.1373
138.328	209.846	60.3329
230.662	165.846	72.1221
225.087	142.308	61.0264
154.355	157.846	80.4438
104.53	175.692	81.1373
193.728	185.692	159.501
144.774	121.077	97.7809
192.857	127.385	62.4133
195.645	154.769	107.49
192.334	194	71.4286
125.261	123.538	99.5856
136.411	186.154	108.564
135.192	144.615	79.4199
104.53	143.231	86.326
136.585	264.769	148.204
84.8432	148.154	110.083
152.787	121.846	126.519
213.763	173.846	163.26
185.017	165.231	112.017
142.334	152.308	170.58
97.561	157.385	119.751
135.889	189.231	120.856
204.704	183.692	123.066
196.516	226.615	125.414
296.69	253.231	68.0939
170.906	122.154	130.801
178.049	193.692	122.099
136.063	206	139.641
127.178	147.538	132.597
144.077	195.692	100.276
148.432	203.692	114.917
131.185	145.231	106.906
211.15	186.308	104.558
112.021	163.385	84.6685
115.854	162.719	172.514
155.226	278.07	221.685
155.052	203.509	122.79
136.237	212.281	123.204
187.282	171.272	167.265
130.662	137.5	138.95
120.557	154.605	96.2707
135.54	146.711	119.061
136.237	174.123	91.0221
111.672	224.561	94.0608
135.192	285.965	101.105
156.446	195.833	95.9945
133.624	217.763	125.967
172.474	122.807	159.116
81.8815	184.43	113.812
172.648	159.211	102.21
152.265	187.061	99.1713
183.798	195.395	132.182
91.6376	182.675
136.063	167.982
148.606	191.228
108.014	198.246
200.348	172.588
101.742	176.535
157.84	280.702
187.108	210.088
123.693	310.526
147.038	358.772
140.244	154.605
169.164	260.746
146.516	252.851
222.857	192.982
177.143	307.018
217.46	167.763
282.222	138.158
204.444	149.123
197.46	225.219
294.603	156.798
262.857	207.237
237.46	238.816
320	133.772
276.825	167.544
224.762	219.079
379.365	183.991
185.079	127.193
226.349	250.877
399.048	161.842
232.063	153.07
284.127	179.167
219.683	168.421
298.73	194.737
249.524	161.404
246.984	279.605
269.524	178.509
477.778	128.07
203.492	140.57
233.016	167.105
221.587	147.588
159.365
257.46
285.397
221.27
183.492
219.683
477.46
246.349
275.556
177.778
278.413
246.667
222.54
182.857
273.016
189.524
197.778
217.46
180
237.143
232.698
166.349
207.619
173.016
182.857
150.794
236.825
243.81
116.508
279.048
213.968
227.619
189.206
426.032
258.413
252.381
232.698
225.397
334.921
213.968
255.873
310.794
371.746
360.952
325.079
475.873
271.429
216.508
222.54
120.635
285.397
182.857
237.778
246.984
155.873
309.841
193.968
225.714
